# Supplementary material for: Relationship Between Brachial‐Ankle Pulse Wave Velocity and Incident Hypertension According to 2017 ACC/AHA High Blood Pressure Guidelines
Source: PubMed Central journal article supplement — J Am Heart Assoc. 2019 Aug 15;8(16):e013019. doi: 10.1161/JAHA.119.013019 (PMC6759909; doi:10.1161/jaha.119.013019), 2019-08-15
Supplement: JAH3-8-e013019-s001.pdf [file JAH3-8-e013019-s001.pdf]

# **SUPPLEMENTAL MATERIAL**

**Table S1. Baseline Characteristics of the Female Study Cohort Stratified by dichotomizing baPWV.**

| Characteristics          | baPWV (cm/sec)                      |                                      | P value |
|--------------------------|-------------------------------------|--------------------------------------|---------|
|                          | Q1-2 (781-1188)<br>(n=1,251, 49.6%) | Q3-4 (1189-1961)<br>(n=1,273, 50.4%) |         |
| Age (years)              | 35.7 (5.2)                          | 38.6 (6.8)                           | <0.001  |
| Glucose (mg/dL)          | 88.2 (7.3)                          | 89.2 (8.3)                           | 0.001   |
| HbA1c (%)                | 5.48 (0.3)                          | 5.52 (0.3)                           | 0.003   |
| AST (SGOT) (IU/L)        | 18.2 (6.2)                          | 19.1 (11.8)                          | 0.021   |
| ALT (SGPT) (IU/L)        | 14.5 (10)                           | 15.8 (18.5)                          | 0.035   |
| GGT (IU/L)               | 15.6 (12.6)                         | 18.0 (20.2)                          | <0.001  |
| Triglyceride (mg/dl)     | 74.5 (38.1)                         | 81.2 (40)                            | <0.001  |
| HDL-C (mg/dl)            | 66.5 (14.3)                         | 65.9 (15)                            | 0.295   |
| LDL-C (mg/dl)            | 103.6 (25.8)                        | 109.8 (28.3)                         | <0.001  |
| Uric acid (mg/dl)        | 4.18 (0.9)                          | 4.24 (0.9)                           | 0.083   |
| hsCRP (mg/l)             | 0.07 (0.2)                          | 0.09 (0.3)                           | 0.171   |
| Insulin (IU/ml)          | 5.07 (2.9)                          | 5.18 (3.1)                           | 0.366   |
| HOMA-IR                  | 1.13 (0.7)                          | 1.16 (0.8)                           | 0.195   |
| BMI (kg/m <sup>2</sup> ) | 21.4 (2.8)                          | 21.5 (2.9)                           | 0.377   |
| Waist (cm)               | 74.1 (7.6)                          | 75.0 (7.7)                           | 0.008   |
| Systolic BP (mmHg)       | 96.5 (8.0)                          | 101.5 (8.6)                          | <0.001  |
| Diastolic BP (mmHg)      | 61.7 (6.3)                          | 65.4 (6.4)                           | <0.001  |
| Education level          |                                     |                                      | 0.133   |
| ≥College graduate        | 1,003 (80.2)                        | 979 (76.9)                           |         |

|                             |              |              |        |
|-----------------------------|--------------|--------------|--------|
| ≤High school                | 203 (16.2)   | 239 (18.8)   |        |
| Unknown                     | 45 (3.6)     | 55 (4.3)     |        |
| Smoking status              |              |              | <0.001 |
| Never / former smoker       | 1,207 (96.5) | 1,180 (92.7) |        |
| Current smoker              | 25 (2)       | 39 (3.1)     |        |
| Unknown                     | 19 (1.5)     | 54 (4.2)     |        |
| Alcohol (g/day)             | 3 (0-6)      | 3 (0-7)      | 0.690  |
| Vigorous exercise frequency |              |              | 0.553  |
| <1 time/week                | 954 (76.3)   | 947 (74.4)   |        |
| ≥1 time/week                | 284 (22.7)   | 312 (24.5)   |        |
| Unknown                     | 13 (1.0)     | 14 (1.1)     |        |

Data are presented as n (%) or mean±SD or median (IQR).

ALT, alanine aminotransferase; AST, aspartate aminotransferase; baPWV, brachial-ankle pulse wave velocity; BMI, body mass index; BP, blood pressure; GGT, gamma glutamyl transferase; HbA1c, hemoglobin A1c; HDL-C, high-density lipoprotein cholesterol; HOMA-IR, homeostasis model assessment of insulin resistance; HTN, hypertension; LDL-C, low-density lipoprotein cholesterol.

**Table S2. Risk of Incident HTN According to baPWV in Men and Women.**

|       | Person-years | Events (No.) | Incident rate (10,000 person-years) | Age-adjusted HR (95% CI) | Multivariable-adjusted HR* (95% CI) |                  |                  |                  |
|-------|--------------|--------------|-------------------------------------|--------------------------|-------------------------------------|------------------|------------------|------------------|
|       |              |              |                                     |                          | Model 1                             | Model 2          | Model 3          | Model 4          |
| Men   |              |              |                                     |                          |                                     |                  |                  |                  |
| Q1    | 5,360.3      | 284          | 529.8                               | 1.00 (reference)         | 1.00 (reference)                    | 1.00 (reference) | 1.00 (reference) | 1.00 (reference) |
| Q2    | 5,763.7      | 409          | 709.6                               | 1.27 (1.09-1.48)         | 1.38 (1.18-1.60)                    | 1.41 (1.21-1.65) | 1.32 (1.13-1.54) | 1.23 (1.05-1.43) |
| Q3    | 5,851.4      | 527          | 900.6                               | 1.61 (1.39-1.86)         | 1.72 (1.49-1.99)                    | 1.79 (1.55-2.07) | 1.59 (1.37-1.84) | 1.45 (1.25-1.68) |
| Q4    | 5,835.8      | 675          | 1156.6                              | 2.06 (1.79-2.37)         | 2.16 (1.88-2.49)                    | 2.28 (1.98-2.62) | 1.8 (1.55-2.08)  | 1.64 (1.41-1.89) |
| Women |              |              |                                     |                          |                                     |                  |                  |                  |
| Q1-2  | 3,036.0246   | 21           | 69.17                               | 1.00 (reference)         | 1.00 (reference)                    | 1.00 (reference) | 1.00 (reference) | 1.00 (reference) |
| Q3-4  | 3,068.449    | 84           | 273.75                              | 3.12 (1.90-5.11)         | 3.33 (2.03-5.47)                    | 3.32(2.02-5.44)  | 1.95 (1.16-3.26) | 1.76 (1.05-2.94) |

baPWV, brachial-ankle pulse wave velocity; CI, confidence interval; HR, hazard ratio; HTN, hypertension.

\*Model 1: adjustment for age, medical center, year of screening examination, smoking status, alcohol intake, exercise and educational level;

Model 2: Model 1 and adjustment for BMI; Model 3: Model 2 and adjustment for SBP; Model 4: Model 3 and adjustment for DBP.

**Table S3. Baseline Characteristics of the Cohort Stratified by Incident HTN.**

| Characteristics          | No incident HTN (n=12,427) | HTN (n=1,095) | <i>P</i> value |
|--------------------------|----------------------------|---------------|----------------|
| Age (years)              | 40.5±7.2                   | 42.8±7.3      | <0.001         |
| Sex                      |                            |               | <0.001         |
| Male                     | 9,789 (78.77)              | 1,053 (96.16) |                |
| Female                   | 2,638 (21.23)              | 42 (3.84)     |                |
| Glucose (mg/dL)          | 93.1 (12.1)                | 95.9 (12.6)   | <0.001         |
| HbA1c (%)                | 5.57 (0.38)                | 5.67 (0.41)   | <0.001         |
| AST (SGOT) (IU/L)        | 23.0 (11.9)                | 26.7 (17.2)   | <0.001         |
| ALT (SGPT) (IU/L)        | 25.0 (18.8)                | 32.5 (29.6)   | <0.001         |
| GGT (IU/L)               | 35.4 (35.7)                | 54.3 (57.4)   | <0.001         |
| Triglyceride (mg/dl)     | 121.4 (77.7)               | 157.0 (119.1) | <0.001         |
| HDL-C (mg/dl)            | 55.3 (14.2)                | 50.7 (12.4)   | <0.001         |
| LDL-C (mg/dl)            | 123.6 (30.4)               | 131.8 (31.4)  | <0.001         |
| Uric acid (mg/dl)        | 5.65 (1.35)                | 6.22 (1.24)   | <0.001         |
| hsCRP (mg/l)             | 0.10 (0.29)                | 0.13 (0.34)   | <0.001         |
| Insulin (IU/ml)          | 5.60 (3.39)                | 6.58 (3.71)   | <0.001         |
| HOMA-IR                  | 1.31 (0.90)                | 1.59 (1.00)   | <0.001         |
| BMI (kg/m <sup>2</sup> ) | 23.7 (2.9)                 | 25.3 (2.8)    | <0.001         |
| Waist circumference (cm) | 82.9 (8.5)                 | 87.6 (7.9)    | <0.001         |
| Systolic BP (mmHg)       | 109.2 (10.6)               | 121.2 (8.2)   | <0.001         |
| Diastolic BP (mmHg)      | 70.7 (8.1)                 | 79.8 (6.2)    | <0.001         |
| Education level          |                            |               | 0.021          |
| ≥College graduate        | 10,799 (86.90)             | 923 (84.29)   |                |

|                             |                 |                 |        |
|-----------------------------|-----------------|-----------------|--------|
| ≤High school                | 1,125 (9.05)    | 111 (10.14)     |        |
| Unknown                     | 503 (4.05)      | 61 (5.57)       |        |
| Smoking status              |                 |                 | <0.001 |
| Never / former smoker       | 8,423 (67.78)   | 636 (58.08)     |        |
| Current smoker              | 3,799 (30.57)   | 440 (40.18)     |        |
| Unknown                     | 205 (1.65)      | 19 (1.74)       |        |
| Alcohol (g/day)             | 10.0 (3.0-23.0) | 17.0 (7.0-34.0) | <0.001 |
| Vigorous exercise frequency |                 |                 | 0.020  |
| <1 time/week                | 7,405 (59.59)   | 607 (55.43)     |        |
| ≥1 time/week                | 4,914 (39.54)   | 475 (43.38)     |        |
| Unknown                     | 108 (0.87)      | 13 (1.19)       |        |

Data are presented as n (%) or mean±SD or median (IQR).

Hypertension was defined as systolic blood pressure  $\geq$ 140 mmHg, diastolic blood pressure  $\geq$  90 mmHg.

ALT, alanine aminotransferase; AST, aspartate aminotransferase; BMI, body mass index; BP, blood pressure; GGT, gamma glutamyl transferase; HbA1c, hemoglobin A1c; HDL-C, high-density lipoprotein cholesterol; HOMA-IR, homeostasis model assessment of insulin resistance; HTN, hypertension; LDL-C, low-density lipoprotein cholesterol.

**Table S4. Baseline Characteristics of the Cohort Stratified by baPWV Quartile in Men.**

| Characteristics          | baPWV quartiles (cm/sec)   |                             |                             |                             | <i>P</i><br>value |
|--------------------------|----------------------------|-----------------------------|-----------------------------|-----------------------------|-------------------|
|                          | Q1 (865-1235)<br>(n=2,697) | Q2 (1236-1321)<br>(n=2,702) | Q3 (1322-1413)<br>(n=2,712) | Q4 (1414-2993)<br>(n=2,731) |                   |
| Age (years)              | 39.9 (6.3)                 | 41.0 (6.6)                  | 41.5 (6.6)                  | 43.7 (8.6)                  | <0.001            |
| Glucose (mg/dL)          | 92.6 (9.8)                 | 93.8 (12.1)                 | 94.7 (13.6)                 | 96.4 (14.5)                 | <0.001            |
| HbA1c (%)                | 5.56 (0.31)                | 5.59 (0.38)                 | 5.61 (0.41)                 | 5.65 (0.48)                 | <0.001            |
| AST (SGOT) (IU/L)        | 23.5 (15.0)                | 23.8 (11.1)                 | 24.6 (12.6)                 | 25.7 (12.5)                 | <0.001            |
| ALT (SGPT) (IU/L)        | 26.6 (22.1)                | 27.1 (17.6)                 | 28.7 (19.5)                 | 30.3 (21.5)                 | <0.001            |
| GGT (IU/L)               | 36.2 (42.7)                | 39.5 (35.2)                 | 43.5 (38.3)                 | 48.2 (43.8)                 | <0.001            |
| Triglyceride (mg/dl)     | 123.7 (72.2)               | 128.6 (74.0)                | 140.5 (90.4)                | 149.1 (101.9)               | <0.001            |
| HDL-C (mg/dl)            | 52.3 (12.2)                | 52.5 (12.9)                 | 51.9 (12.5)                 | 52.0 (12.5)                 | 0.247             |
| LDL-C (mg/dl)            | 125.6 (29.6)               | 127.0 (29.2)                | 128.9 (29.4)                | 132.0 (30.8)                | <0.001            |
| Uric acid (mg/dl)        | 6.02 (1.16)                | 6.02 (1.16)                 | 6.06 (1.22)                 | 6.12 (1.21)                 | 0.005             |
| hsCRP (mg/l)             | 0.98 (0.22)                | 0.10 (0.25)                 | 0.11 (0.34)                 | 0.13 (0.37)                 | <0.001            |
| Insulin (IU/ml)          | 5.55 (3.42)                | 5.66 (3.28)                 | 5.85 (3.38)                 | 6.18 (3.78)                 | <0.001            |
| HOMA-IR                  | 1.29 (0.88)                | 1.33 (0.85)                 | 1.39 (0.92)                 | 1.50 (1.06)                 | <0.001            |
| BMI (kg/m <sup>2</sup> ) | 24.61 (2.81)               | 24.34 (2.62)                | 24.35 (2.67)                | 24.33 (2.71)                | <0.001            |
| Waist (cm)               | 85.6 (7.5)                 | 85.2 (7.1)                  | 85.3 (7.3)                  | 85.5 (7.3)                  | 0.193             |
| Systolic BP (mmHg)       | 108.6 (9.0)                | 111.6 (9.3)                 | 113.7 (9.1)                 | 116.8 (9.3)                 | <0.001            |
| Diastolic BP (mmHg)      | 69.9 (7.3)                 | 72.4 (7.3)                  | 74.0 (7.2)                  | 76.2 (7.1)                  | <0.001            |
| Education level          |                            |                             |                             |                             | <0.001            |
| ≥College graduate        | 2,492 (92.4)               | 2,448 (90.60)               | 2,415 (89.05)               | 2,275 (83.30)               |                   |
| ≤High school             | 133 (4.93)                 | 161 (5.96)                  | 185 (6.82)                  | 277 (10.14)                 |                   |

|                             |               |               |                 |                 |        |
|-----------------------------|---------------|---------------|-----------------|-----------------|--------|
| Unknown                     | 72 (2.67)     | 93 (3.44)     | 112 (4.13)      | 179 (6.55)      |        |
| Smoking status              |               |               |                 |                 | 0.021  |
| Never / former smoker       | 1,643 (60.92) | 1,629 (60.29) | 1,640 (60.49)   | 1,616 (59.17)   |        |
| Current smoker              | 1,034 (38.34) | 1,033(38.23)  | 1,037 (38.24)   | 1,063 (38.92)   |        |
| Unknown                     | 20 (0.74)     | 40 (1.48)     | 35 (1.29)       | 52 (1.90)       |        |
| Alcohol (g/day)             | 11 (4.0-24.0) | 12 (5.0-28.0) | 14.0 (6.0-29.0) | 13.0 (5.0-28.0) | <0.001 |
| Vigorous exercise frequency |               |               |                 |                 | <0.001 |
| <1 time/week                | 1,417 (52.54) | 1,460 (54.03) | 1,541 (56.82)   | 1,572 (57.56)   |        |
| ≥1 time/week                | 1,263 (46.83) | 1,214 (44.93) | 1,153 (42.51)   | 1,128 (41.30)   |        |
| Unknown                     | 17 (0.63)     | 28 (1.04)     | 18 (0.66)       | 31 (1.14)       |        |

Data are presented as n (%) or mean±SD or median (IQR).

Hypertension was defined as systolic blood pressure  $\geq$ 140 mmHg, diastolic blood pressure  $\geq$ 90 mmHg.

ALT, alanine aminotransferase; AST, aspartate aminotransferase; baPWV, brachial-ankle pulse wave velocity; BMI, body mass index; BP, blood pressure; GGT, gamma glutamyl transferase; HbA1c, hemoglobin A1c; HDL-C, high-density lipoprotein cholesterol; HOMA-IR, homeostasis model assessment of insulin resistance; HTN, hypertension; LDL-C, low-density lipoprotein cholesterol.



**Table S5. Baseline Characteristics of the Cohort Stratified by baPWV Quartile in Women.**

| Characteristics          | baPWV quartiles (cm/sec) |                           |                           |                           | P value |
|--------------------------|--------------------------|---------------------------|---------------------------|---------------------------|---------|
|                          | Q1 (781-1110)<br>(n=670) | Q2 (1111-1197)<br>(n=664) | Q3 (1198-1282)<br>(n=671) | Q4 (1283-2092)<br>(n=675) |         |
| Age (years)              | 35.1 (5.0)               | 36.5 (5.3)                | 37.6 (6.2)                | 40.4 (7.5)                | <0.001  |
| Glucose (mg/dL)          | 87.9 (7.9)               | 88.7 (7.2)                | 88.6 (7.5)                | 90.5 (9.4)                | 0.0001  |
| HbA1c (%)                | 5.47 (0.26)              | 5.49 (0.26)               | 5.50 (0.26)               | 5.55 (0.31)               | <0.001  |
| AST (SGOT) (IU/L)        | 18.1 (6.5)               | 18.3 (6.3)                | 19.2 (14.5)               | 19.3 (7.8)                | 0.050   |
| ALT (SGPT) (IU/L)        | 14.6 (11.9)              | 14.7 (9.7)                | 16.1 (23.8)               | 15.8 (9.6)                | 0.171   |
| GGT (IU/L)               | 15.3 (13.0)              | 16.0 (12.5)               | 17.3 (22.2)               | 19.4 (18.3)               | <0.001  |
| Triglyceride (mg/dl)     | 73.4 (33.8)              | 76.8 (48.0)               | 76.9 (34.9)               | 87.5 (44.2)               | <0.001  |
| HDL-C (mg/dl)            | 66.6 (14.5)              | 66.2 (14.0)               | 66.7 (14.9)               | 64.9 (14.9)               | 0.095   |
| LDL-C (mg/dl)            | 102.2 (24.4)             | 105.4 (26.7)              | 107.3 (26.7)              | 115.1 (30.2)              | <0.001  |
| Uric acid (mg/dl)        | 4.18 (0.91)              | 4.18 (0.83)               | 4.24 (0.85)               | 4.25 (0.87)               | 0.263   |
| hsCRP (mg/l)             | 0.07 (0.20)              | 0.07 (0.17)               | 0.07 (0.21)               | 0.10 (0.36)               | 0.105   |
| Insulin (IU/ml)          | 5.12 (3.50)              | 5.13 (2.92)               | 5.03 (2.93)               | 5.41 (3.32)               | 0.135   |
| HOMA-IR                  | 1.14 (0.93)              | 1.14 (0.71)               | 1.12 (0.72)               | 1.24 (0.83)               | 0.036   |
| BMI (kg/m <sup>2</sup> ) | 21.53 (3.06)             | 21.39 (2.78)              | 21.38 (2.95)              | 21.90 (3.10)              | 0.003   |
| Waist (cm)               | 74.24 (7.87)             | 74.46 (7.73)              | 74.60 (7.86)              | 75.84 (7.98)              | <0.001  |
| Systolic BP (mmHg)       | 95.9 (8.2)               | 97.7 (8.5)                | 100.3 (8.9)               | 107.0 (10.7)              | <0.001  |
| Diastolic BP (mmHg)      | 61.1 (6.5)               | 62.8 (6.7)                | 64.9 (7.0)                | 69.4 (8.0)                | <0.001  |
| Education level          |                          |                           |                           |                           | <0.001  |
| ≥College graduate        | 546 (81.49)              | 520 (78.31)               | 545 (81.22)               | 481 (71.26)               |         |
| ≤High school             | 104 (15.52)              | 115 (17.32)               | 98 (14.61)                | 163 (24.15)               |         |

|                             |               |               |               |               |       |
|-----------------------------|---------------|---------------|---------------|---------------|-------|
| Unknown                     | 20 (2.99)     | 29 (4.37)     | 28 (4.17)     | 31 (4.59)     |       |
| Smoking status              |               |               |               |               | 0.001 |
| Never / former smoker       | 648 (96.72)   | 636 (95.78)   | 627 (93.44)   | 620 (91.85)   |       |
| Current smoker              | 15 (2.24)     | 15 (2.26)     | 17 (2.53)     | 25 (3.70)     |       |
| Unknown                     | 7 (1.04)      | 13 (1.96)     | 27 (4.02)     | 30 (4.44)     |       |
| Alcohol (g/day)             | 3.0 (1.0-7.0) | 3.0 (0.0-6.0) | 3.0 (1.0-7.0) | 3.0 (1.0-7.0) | 0.572 |
| Vigorous exercise frequency |               |               |               |               | 0.877 |
| <1 time/week                | 504 (75.22)   | 511 (76.96)   | 504 (75.11)   | 503 (74.52)   |       |
| ≥1 time/week                | 160 (23.88)   | 145 (21.84)   | 162 (24.14)   | 164 (24.30)   |       |
| Unknown                     | 6 (0.90)      | 8 (1.20)      | 5 (0.75)      | 8 (1.19)      |       |

Data are presented as n (%) or mean±SD or median (IQR).

Hypertension was defined as systolic blood pressure  $\geq$  140 mmHg, diastolic blood pressure  $\geq$  90 mmHg.

HbA1c, hemoglobin A1c; ALT, alanine aminotransferase; AST, Aspartate Aminotransferase; GGT, gamma glutamyl transferase; BP, blood pressure; BMI, body mass index; HTN, hypertension; HDL-C, high density lipoprotein cholesterol; HOMA IR, homeostasis model assessment of insulin resistance; LDL-C, low density lipoprotein cholesterol.

**Table S6. Risk of Incident HTN According to baPWV in Men and Women.**

|       | Person-years | Events (No.) | Incident rate (10,000 person-years) | Age-adjusted HR (95% CI) | Multivariable-adjusted HR* (95% CI) |                     |                   |                   |
|-------|--------------|--------------|-------------------------------------|--------------------------|-------------------------------------|---------------------|-------------------|-------------------|
|       |              |              |                                     |                          | Model 1                             | Model 2             | Model 3           | Model 4           |
| Men   |              |              |                                     |                          |                                     |                     |                   |                   |
| Q1    | 7,789.6      | 106          | 136.0                               | 1.00 (reference)         | 1.00 (reference)                    | 1.00 (reference)    | 1.00 (reference)  | 1.00 (reference)  |
| Q2    | 8,244.8      | 180          | 218.3                               | 1.57 (1.24-2.00)         | 1.68 (1.32-2.14)                    | 1.77 (1.39-2.25)    | 1.38 (1.08-1.76)  | 1.29 (1.0-1.64)   |
| Q3    | 8,424.1      | 299          | 354.9                               | 2.54 (2.03-3.17)         | 2.70 (2.16-3.38)                    | 2.85 (2.28-3.56)    | 1.98 (1.58-2.48)  | 1.80 (1.44-2.26)  |
| Q4    | 8,439.6      | 468          | 554.5                               | 3.90 (3.15-4.83)         | 4.04 (3.26-5.00)                    | 4.19 (3.38-5.19)    | 2.19 (1.75-2.73)  | 1.96 (1.57-2.46)  |
| Women |              |              |                                     |                          |                                     |                     |                   |                   |
| Q1    | 1,625.5      | 1            | 6.1                                 | 1.00 (reference)         | 1.00 (reference)                    | 1.00 (reference)    | 1.00 (reference)  | 1.00 (reference)  |
| Q2    | 1,639.8      | 7            | 42.6                                | 6.82 (0.84-55.57)        | 6.69 (0.82-54.63)                   | 7.23 (0.89-59.10)   | 3.76 (0.45-31.69) | 3.03 (0.36-25.92) |
| Q3    | 1,635.2      | 4            | 24.4                                | 3.64 (0.41-32.74)        | 3.96 (0.44-35.78)                   | 4.07 (0.45-36.74)   | 2.01 (0.22-18.48) | 1.62 (0.17-15.10) |
| Q4    | 1,635.0      | 30           | 183.4                               | 26.07 (3.49-194.86)      | 29.67 (3.94-223.32)                 | 31.34 (4.16-235.94) | 5.01 (0.62-40.69) | 3.89 (0.47-32.10) |

baPWV, brachial-ankle pulse wave velocity; CI, confidence interval; HR, hazard ratio; HTN, hypertension.

Hypertension was defined as systolic blood pressure  $\geq$  140 mmHg, diastolic blood pressure  $\geq$  90 mmHg.

\*Model 1: adjustment for age, medical center, year of screening examination, smoking status, alcohol intake, exercise and educational level; Model 2: Model 1 and adjustment for BMI; Model 3: Model 2 and adjustment for SBP; Model 4: Model 3 and adjustment for DBP.

**Table S7. The Incidence Rate of Hypertension According to baPWV Quartile and SBP Quartile in Men and Women.**

|                                  | Incidence rate of hypertension (1,000 person-years) |        |        |        |                             |       |       |        |
|----------------------------------|-----------------------------------------------------|--------|--------|--------|-----------------------------|-------|-------|--------|
|                                  | Quartiles of baPWV in Men                           |        |        |        | Quartiles of baPWV in Women |       |       |        |
|                                  | Q1                                                  | Q2     | Q3     | Q4     | Q1                          | Q2    | Q3    | Q4     |
| Quartiles of baseline SBP (mmHg) |                                                     |        |        |        |                             |       |       |        |
| S1 (70-99)                       | 10.97                                               | 18.24  | 37.68  | 21.74  | 0.00                        | 1.12  | 6.98  | 4.32   |
| S2 (100-106)                     | 34.49                                               | 45.50  | 50.51  | 66.26  | 8.98                        | 16.05 | 10.07 | 29.16  |
| S3 (107-112)                     | 62.36                                               | 75.99  | 90.80  | 120.89 | 6.97                        | 27.93 | 25.37 | 60.00  |
| S4 (112-129)                     | 95.06                                               | 112.98 | 131.60 | 147.36 | 0.00                        | 57.84 | 64.76 | 102.73 |

baPWV, brachial-ankle pulse wave velocity; SBP, systolic blood pressure.

**Figure S1. Incident hypertension rate by quartiles of baseline systolic blood pressure and dichotomization of baPWV in women.**

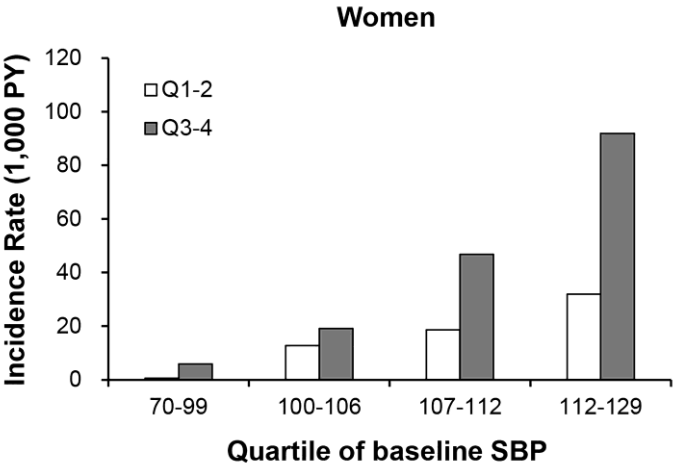

baPWV, brachial-ankle pulse wave velocity.

**Figure S2. Kaplan–Meier Curves for incident hypertension according to baPWV in men and women.**

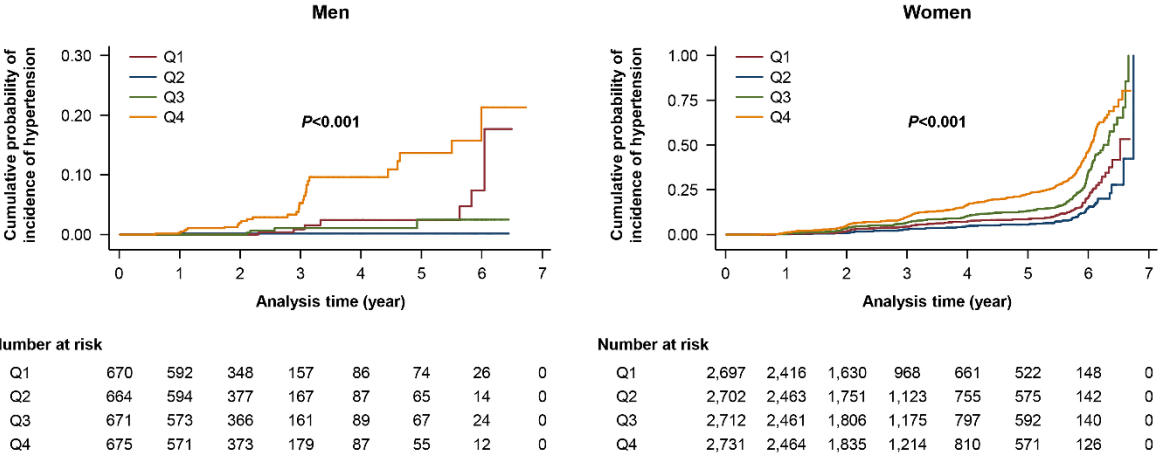

Hypertension was defined as systolic blood pressure  $\geq 140$  mmHg, diastolic blood pressure  $\geq 90$  mmHg.
